# Supplementary material for: Distinct virologic trajectories in chronic hepatitis B identify heterogeneity in response to nucleos(t)ide analogue therapy
Source: PubMed Central journal article supplement (PMC11664071; doi:10.1016/j.jhepr.2024.101229), 2024-10-09
Supplement: mmc1.pdf [file mmc1.pdf]

# **Distinct virologic trajectories in chronic hepatitis B identify heterogeneity in response to nucleos(t)ide analogue therapy**

Tingyan Wang, Cori Campbell, Alexander J Stockdale, Stacy Todd, Karl McIntyre, Andrew Frankland, Jakub Jaworski, Ben Glampson, Dimitri Papadimitriou, Luca Mercuri, Erik Mayer, Christopher R Jones, Hizni Salih, Gail Roadknight, Stephanie Little, Theresa Noble, Kinga A Várnai, Cai Davis, Ashley I Heinson, Michael George, Florina Borca, Louise English, Luis Romão, David Ramlakhan, NIHR HIC Viral Hepatitis and Liver Disease Consortium, Kerrie Woods, Jim Davies, Eleni Nastouli, Salim I Khakoo, William Gelson, Graham S Cooke, Eleanor Barnes, Philippa C Matthews

## Table of contents

|               |    |
|---------------|----|
| Fig. S1.....  | 3  |
| Fig. S2.....  | 4  |
| Fig. S3.....  | 5  |
| Fig. S4.....  | 6  |
| Fig. S5.....  | 7  |
| Fig. S6.....  | 8  |
| Fig. S7.....  | 9  |
| Table S1..... | 10 |
| Table S2..... | 11 |
| Table S3..... | 12 |
| Table S4..... | 12 |
| Table S5..... | 13 |

|                |    |
|----------------|----|
| Table S6.....  | 16 |
| Table S7.....  | 20 |
| Table S8.....  | 20 |
| Table S9.....  | 21 |
| Table S10..... | 23 |
| Table S11..... | 24 |
| Table S12..... | 24 |
| Table S13..... | 25 |
| Table S14..... | 27 |
| Table S15..... | 28 |
| Table S16..... | 29 |
| Table S17..... | 30 |
| Table S18..... | 31 |

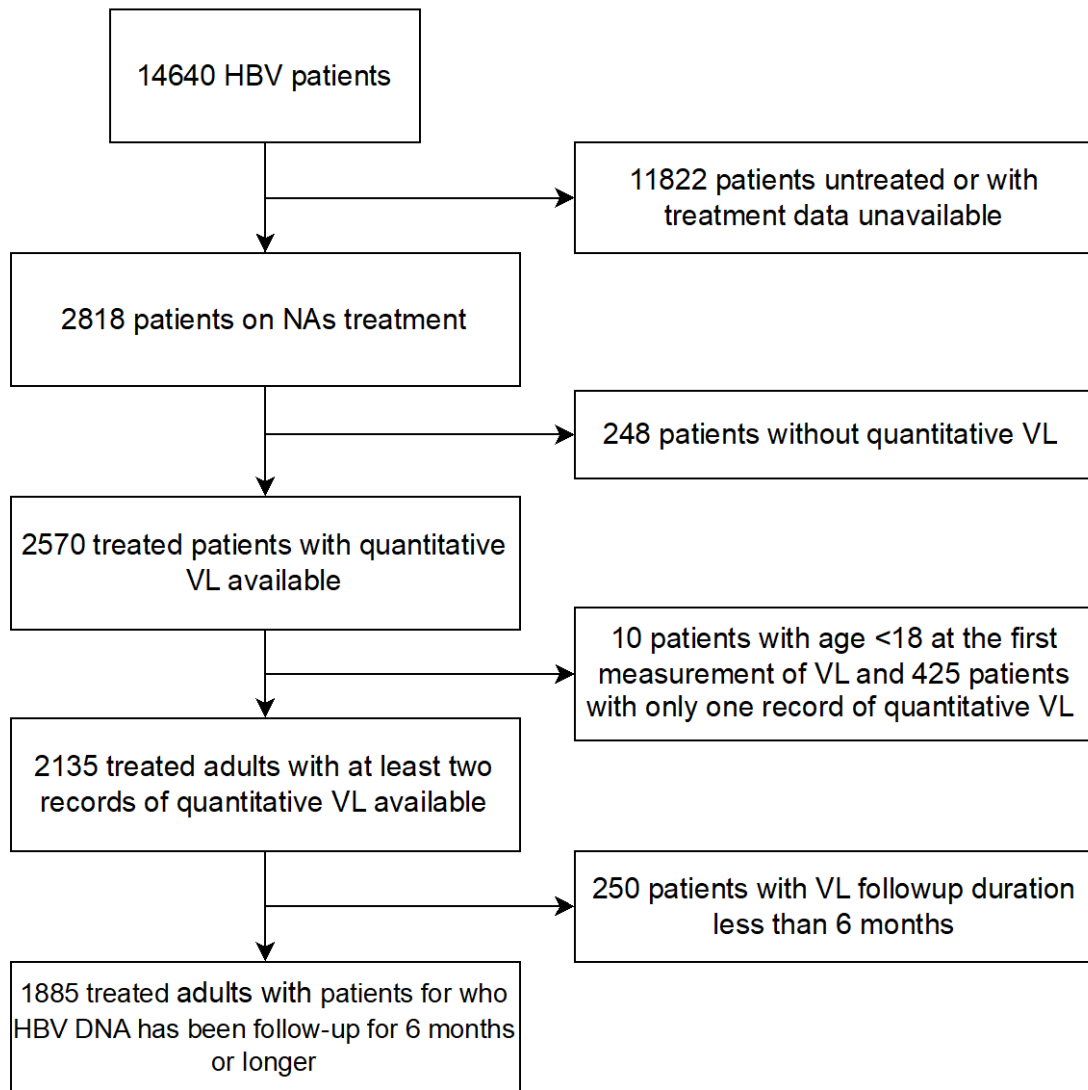

**Fig. S1.** Flowchart of patient selection for a study of viral load trajectories in adults receiving NA therapy for chronic HBV infection in the UK.

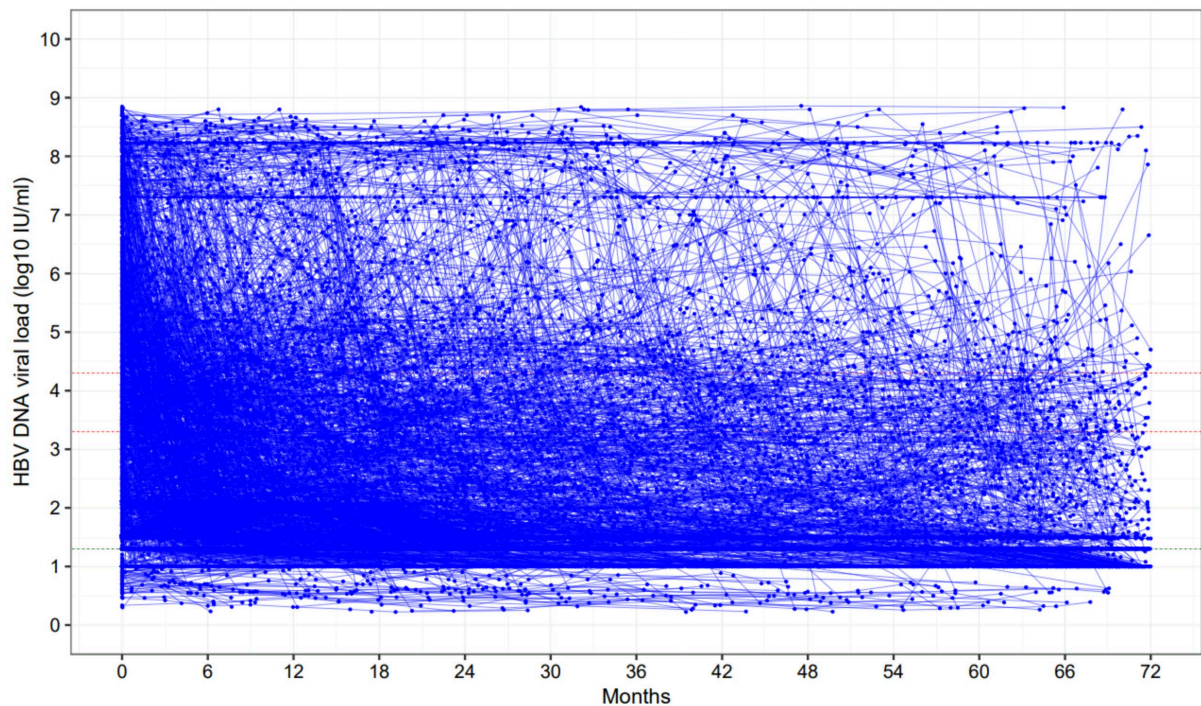

**Fig. S2.** Overview of individual virologic trajectories in 1885 adults with CHB on NA therapy (prior to the latent class analysis). *In the study cohort, 150 individuals had VL reported as ‘detectable’ without a quantitative result at some point during their clinical record. This typically suggests a level of viraemia that is below the limit of quantification but at which the assay can still detect the presence of HBV DNA. However, in the majority of these (103/150) the unquantified value occurred in the middle of a longitudinal record of quantitative VL measurements and was therefore not likely to influence the class assigned by the model. To avoid assigning an arbitrary numerical value to qualitative results, we therefore excluded VL datapoints that had a qualitative-only result.*

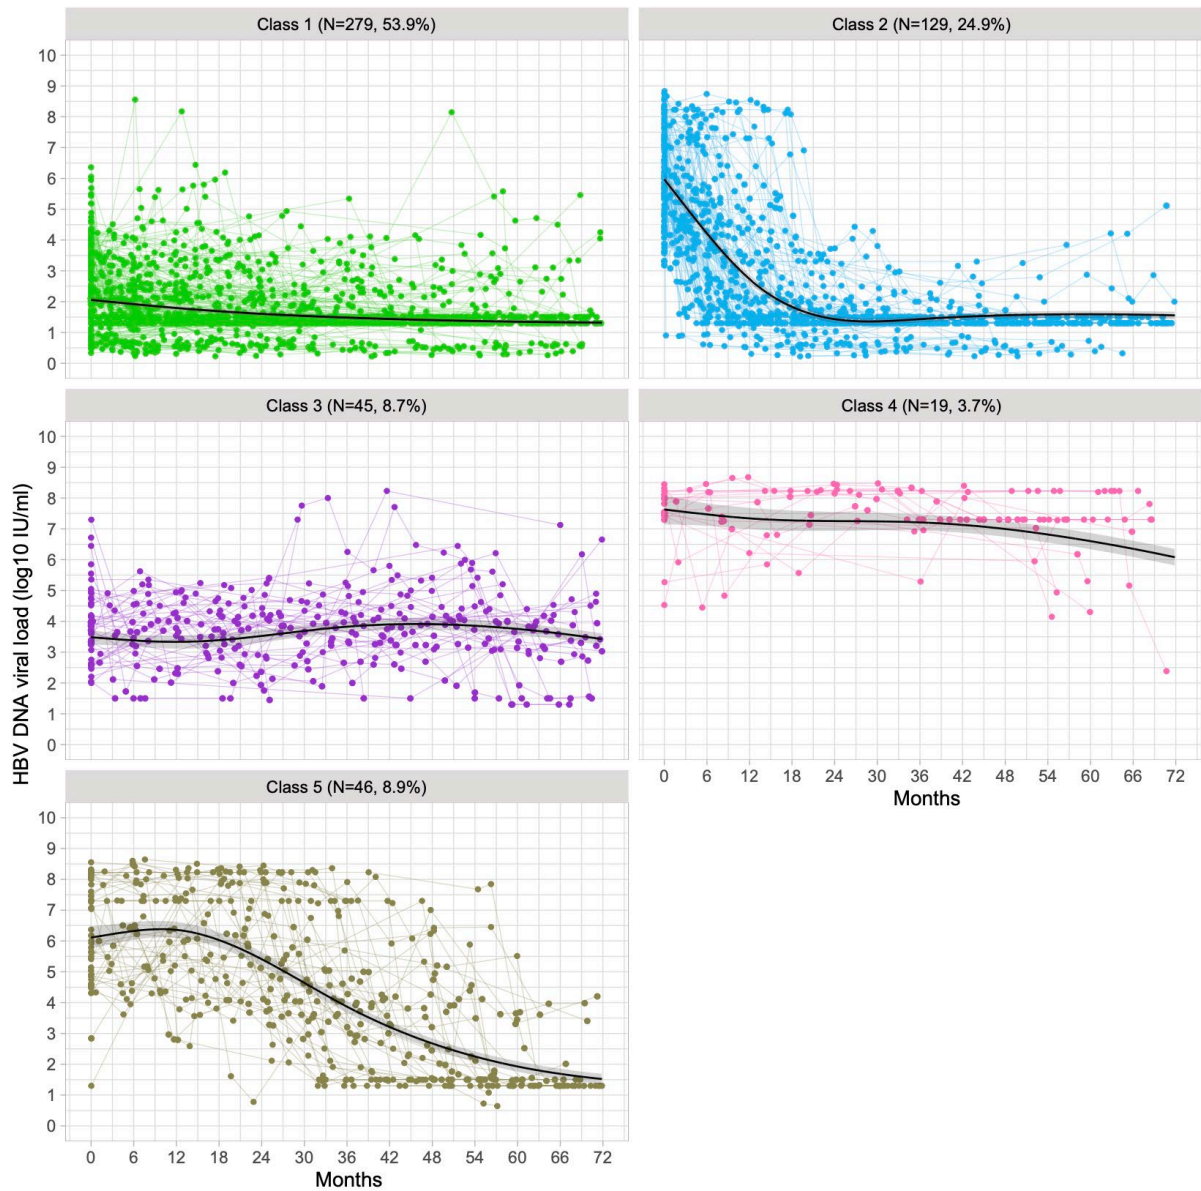

**Fig. S3.** Individual trajectories of HBV DNA viral load (VL) against the identified five VL trajectory patterns ('classes 1-5') for chronic hepatitis B patients on treatment in validation cohort (n=518). *Individual VL trajectories of validation cohort were classified using the estimated model based on derivation cohort. Dots represent the real values of VL, and solid lines with shading area represent the predicted VL trajectory patterns with 95% confidence intervals.*

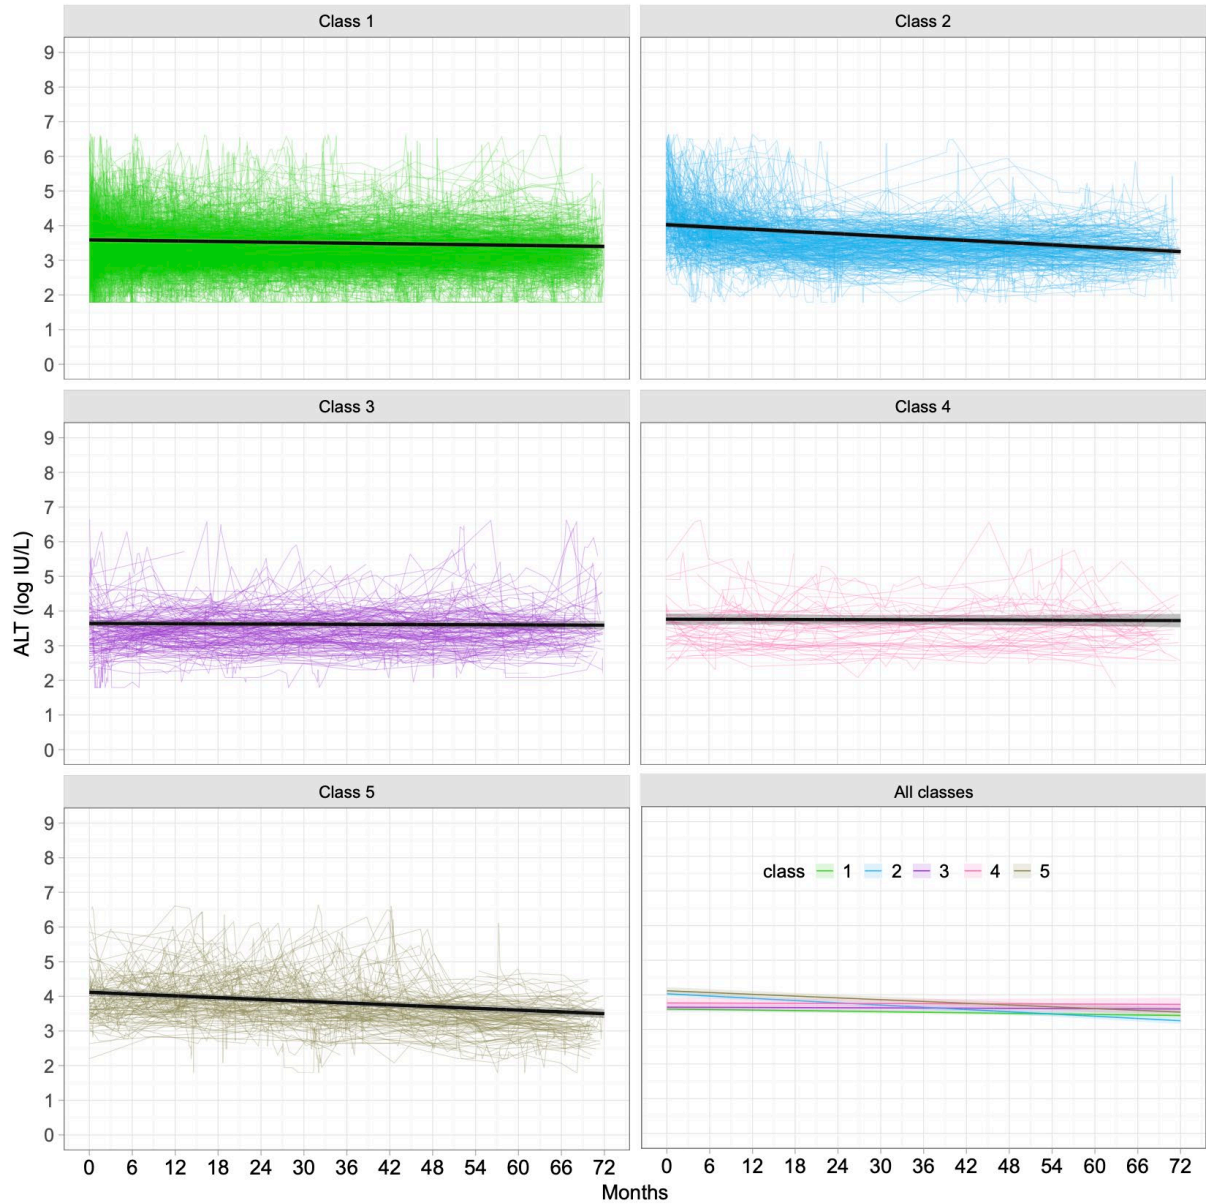

**Fig. S4.** Longitudinal trend of ALT levels (log IU/L) stratified by VL trajectory patterns in overall study cohort (n=1883, combining derivation and validation cohorts according to their identified VL trajectories, ALT data unavailable for three patients). *The trend was assessed by linear mixed effects models, considering the repeated measurements of each individual patient and adjusted for age, sex, and ethnicity. Coloured bands of the solid lines in last panel represent 95% confidence intervals.*



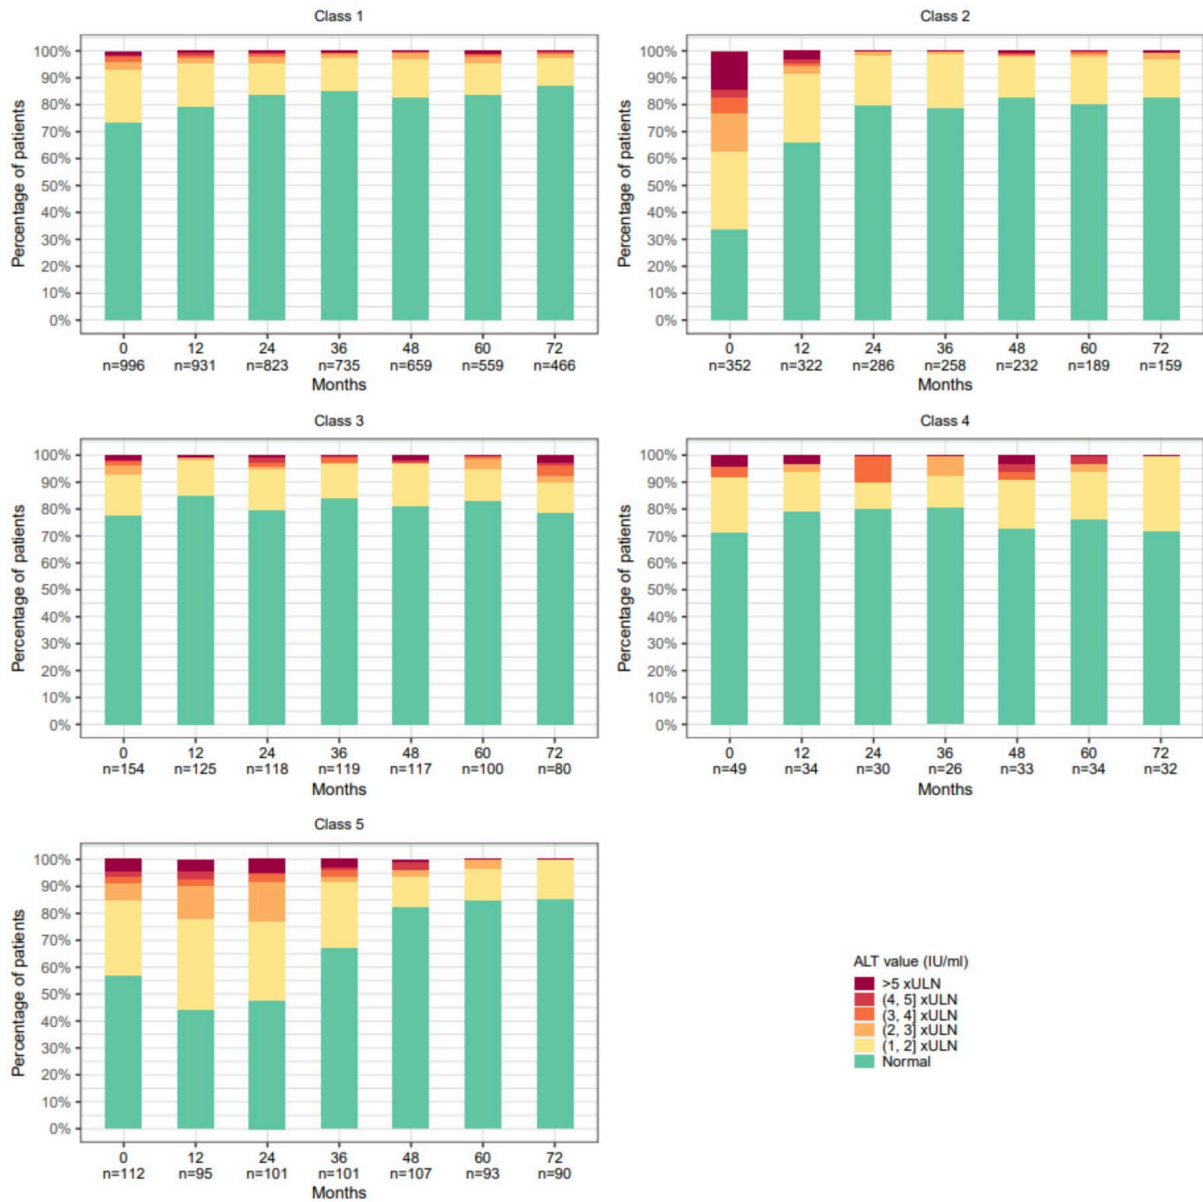

**Fig. S5.** Stratification of ALT levels over time for patients with distinct virologic trajectory patterns. *ALT*, Alanine aminotransferase. *ULN*, upper limit of normal.

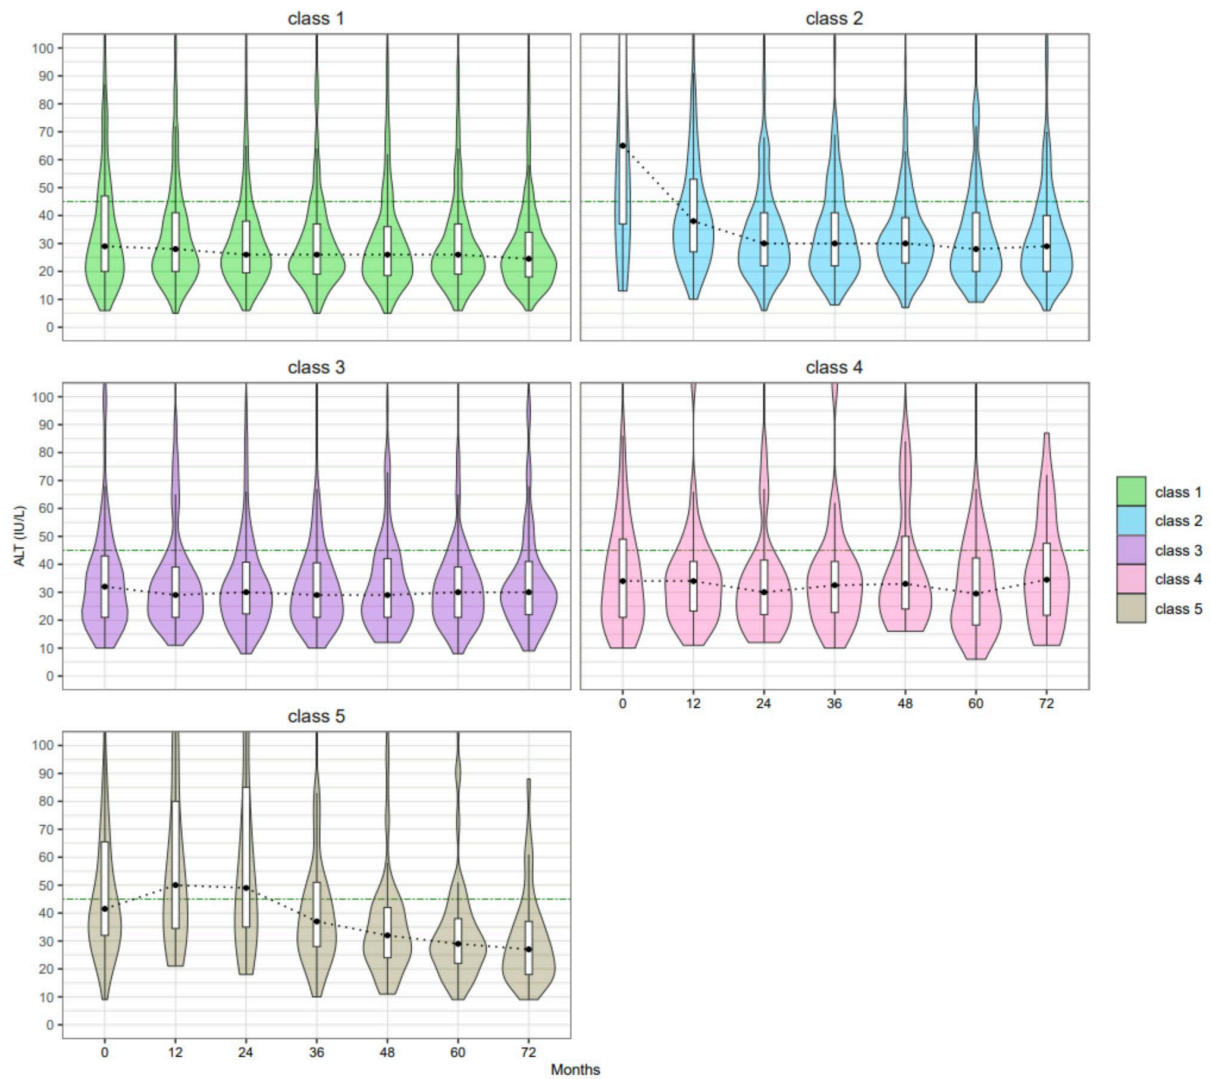

**Fig. S6.** Distribution of ALT levels at each time point for patients with distinct virologic trajectory patterns. *Green dash-dotted lines indicate the upper limit of normal (ULN) of ALT. Black dotted lines indicate the median values of ALT at each time point. The box represents the median and interquartile range, and the whiskers represent the adjacent values, which are within 1.5 times the interquartile range.*



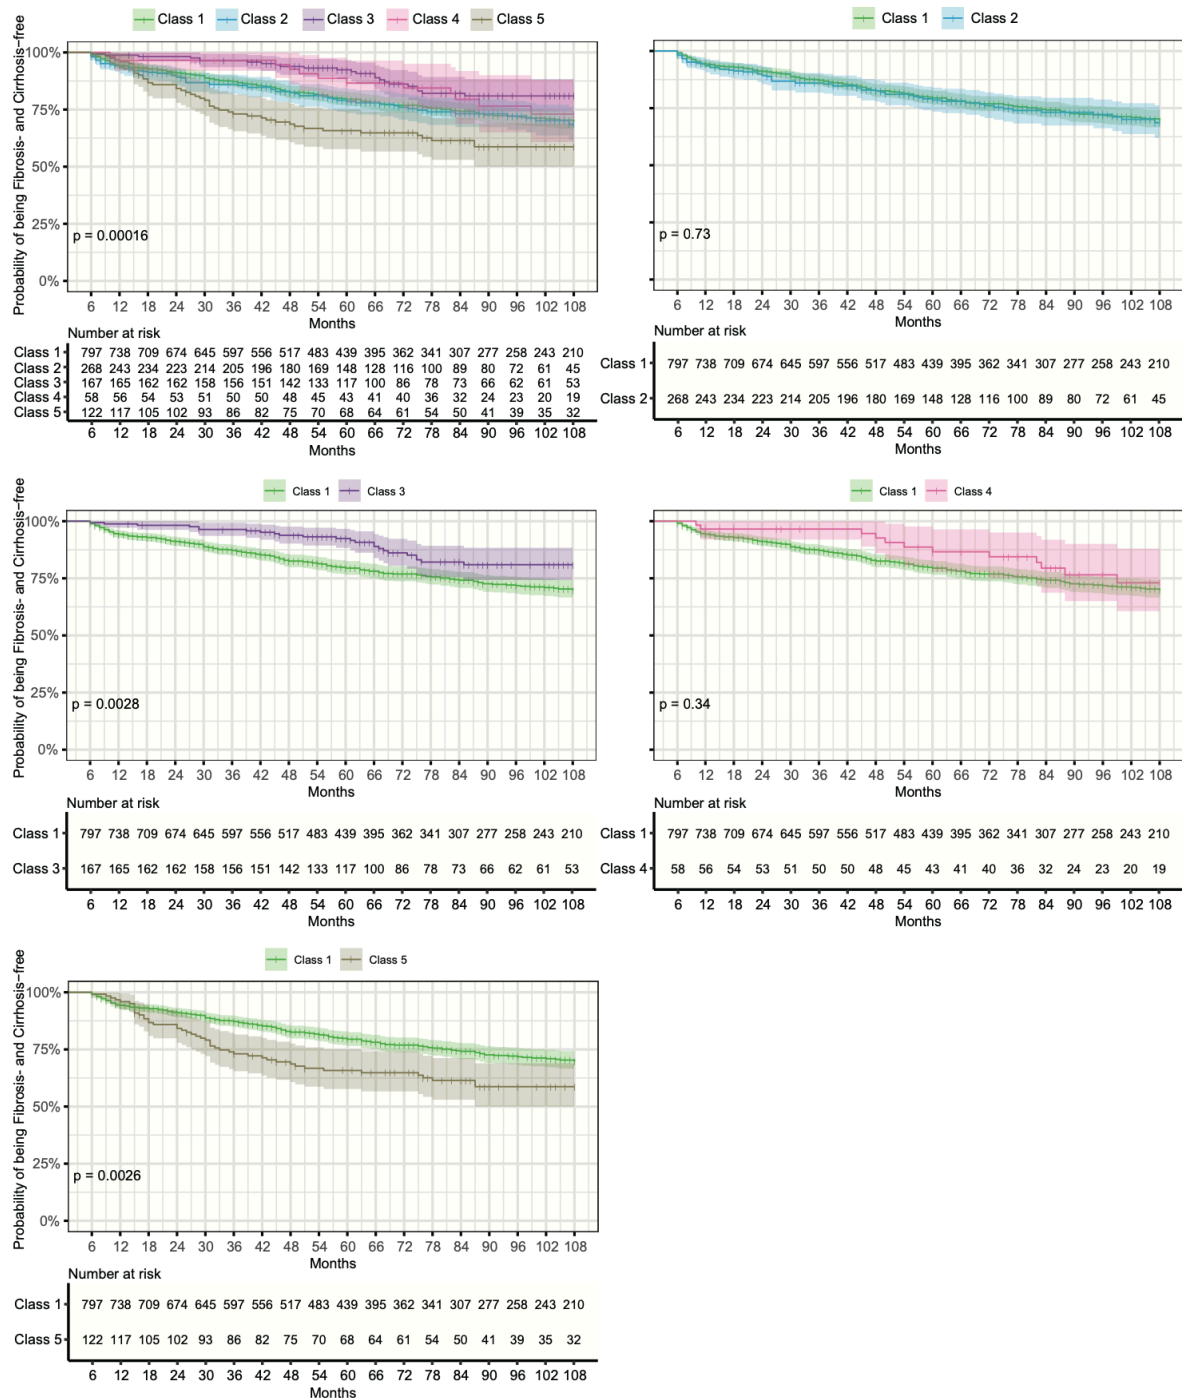

**Fig. S7.** Progression to liver fibrosis and/or cirrhosis and VL trajectories of adult population with chronic HBV infection treated with NA therapy plotted as Kaplan-Meier (K-M) curves. K-M curves were truncated at 75% quantiles of follow up duration (months=108) of liver fibrosis/cirrhosis status. Shading areas represent 95% confidence intervals. The shape "┘" indicates censoring. Note that classes 3 and 4 are characterised by being more female and younger (see Figure 2), which may be associated with slower rate of progression. HBV, Hepatitis B Virus; VL, viral load; NA, nucleos/tide analogue.

**Table S1.** Laboratory parameters used in this study

| Category                                                      | Laboratory parameter | Full name                            |
|---------------------------------------------------------------|----------------------|--------------------------------------|
| HBV lab tests                                                 | HBsAg                | Hepatitis B surface antigen          |
|                                                               | HBV DNA VL           | HBV DNA viral load                   |
|                                                               | HBeAg                | Hepatitis B e-Antigen                |
|                                                               | Anti-HBe             | Anti-Hepatitis B e-antigen           |
| Liver biochemistry and other tests reflecting liver health    | ALT                  | Alanine aminotransferase             |
|                                                               | AST                  | Aspartate aminotransferase           |
|                                                               | Albumin              |                                      |
|                                                               | ALP                  | Alkaline phosphatase                 |
|                                                               | Bilirubin            |                                      |
|                                                               | Platelets            |                                      |
| Renal function                                                | eGFR                 | Estimated Glomerular Filtration Rate |
|                                                               | Urea                 |                                      |
| Virology tests for other chronic viral coinfections inference | HIV                  | Human immunodeficiency virus         |
|                                                               | HCV                  | Hepatitis C virus                    |
|                                                               | HDV                  | Hepatitis D virus                    |

**Table S2.** Calculation of discrimination and entropy

| <b>Metrics</b> | <b>Formula</b>                                                            | <b>Note</b>                                                                                                                                                                                     |
|----------------|---------------------------------------------------------------------------|-------------------------------------------------------------------------------------------------------------------------------------------------------------------------------------------------|
| Discrimination | $\frac{\sum_{i=1}^N \max \{P_i^k, k = 1, 2, 3, K\}}{N}$                   | $K$ represents the number of classes, $N$ indicates the number of patients included in the cohort for modelling. $P_i^k$ indicates the probability of patient $i$ being assigned to class $k$ . |
| Entropy        | $1 + \sum_{i=1}^N \frac{\sum_k \log(P_i^k) \cdot P_i^k}{N \cdot \log(K)}$ |                                                                                                                                                                                                 |

**Table S3.** Performance of the models with different number of classes of VL trajectories in the derivation cohort.

| Number of classes | BIC   | SABIC | AIC   | Entropy | Proportion for each class            |
|-------------------|-------|-------|-------|---------|--------------------------------------|
| 1                 | 55654 | 55629 | 55612 | 1       | 100%                                 |
| 2                 | 54017 | 53954 | 53913 | 0.86    | 78.3%: 21.7%                         |
| 3                 | 53212 | 53110 | 53045 | 0.88    | 72.7%: 19.6%: 7.7%                   |
| 4                 | 52361 | 52221 | 52131 | 0.91    | 66.9%: 18.4%: 7.0%: 7.7%             |
| 5                 | 52124 | 51946 | 51832 | 0.90    | 60.5%: 18.6%: 10.2%: 3.2%: 7.5%      |
| 6                 | 51868 | 51652 | 51513 | 0.90    | 59.6%: 18.5%: 3.3%: 9.1%: 3.1%: 6.3% |

**Table S4.** Classification performance of final estimated model in the derivation and validations cohorts

| Assessment metrics    | Derivation cohort                      | Validation cohort                      |
|-----------------------|----------------------------------------|----------------------------------------|
| Discrimination        | 0.93                                   | 0.9287                                 |
| Entropy               | 0.90                                   | 0.8815                                 |
| APPA for each class   | 0.9509: 0.9221: 0.8543: 0.9436: 0.9330 | 0.9370: 0.9224: 0.8643: 0.9751: 0.9403 |
| Proportions per class | 60.5%: 18.6%: 10.2%: 3.2%: 7.5%        | 53.9%: 24.9%: 8.7%: 3.7%: 8.9%         |

APPA, average posterior probability assignment

**Table S5.** Characteristics of patients at presentation stratified by the virologic trajectory patterns identified by latent class mixed modelling in the derivation cohort (n=1367)

| Characteristics       | Class 1<br>N=827 (60.5%) | Class 2<br>N=254 (18.6%)       | Class 3<br>N=140 (10.2%)     | Class 4<br>N=44 (3.2%)         | Class 5<br>N=102 (7.5%)      | p value          |
|-----------------------|--------------------------|--------------------------------|------------------------------|--------------------------------|------------------------------|------------------|
|                       | Long term suppression    | Timely virological suppression | Persistent moderate viraemia | Persistent high-level viraemia | Slow virological suppression |                  |
| Sex, male             | 526 (63.6)               | 66 (47.1)                      | 526 (63.6)                   | 179 (70.5)                     | 9 (20.5)                     | <b>&lt;0.001</b> |
| Age, years            | 47 [37, 58]              | 44 [34, 55]                    | 38 [33, 45]                  | 30 [23, 35]                    | 36 [28, 46]                  | <b>&lt;0.001</b> |
| Age group, years      |                          |                                |                              |                                |                              | <b>&lt;0.001</b> |
| 18-24                 | 16 (1.9)                 | 7 (2.8)                        | 4 (2.9)                      | 14 (31.8)                      | 14 (13.7)                    |                  |
| 25-34                 | 149 (18.0)               | 62 (24.4)                      | 43 (30.7)                    | 18 (40.9)                      | 32 (31.4)                    |                  |
| 35-44                 | 187 (22.6)               | 59 (23.2)                      | 57 (40.7)                    | 10 (22.7)                      | 25 (24.5)                    |                  |
| 45-54                 | 205 (24.8)               | 59 (23.2)                      | 30 (21.4)                    | 2 (4.5)                        | 19 (18.6)                    |                  |
| 55-64                 | 147 (17.8)               | 43 (16.9)                      | 5 (3.6)                      | 0 (0.0)                        | 11 (10.8)                    |                  |
| 65-74                 | 94 (11.4)                | 17 (6.7)                       | 1 (0.7)                      | 0 (0.0)                        | 1 (1.0)                      |                  |
| >=75                  | 29 (3.5)                 | 7 (2.8)                        | 0 (0.0)                      | 0 (0.0)                        | 0 (0.0)                      |                  |
| Ethnic group          |                          |                                |                              |                                |                              |                  |
| Asian                 | 211 (30.8)               | 86 (41.7)                      | 62 (47.7)                    | 23 (67.6)                      | 36 (43.4)                    | <b>&lt;0.001</b> |
| Black                 | 175 (25.5)               | 34 (16.5)                      | 19 (14.6)                    | 6 (17.6)                       | 9 (10.8)                     |                  |
| White                 | 172 (25.1)               | 44 (21.4)                      | 18 (13.8)                    | 1 (2.9)                        | 25 (30.1)                    |                  |
| Mixed/other ethnicity | 127 (18.5)               | 42 (20.4)                      | 31 (23.8)                    | 4 (11.8)                       | 13 (15.7)                    |                  |
| Not reported          | 142 (17.2)               | 48 (18.9)                      | 10 (7.1)                     | 10 (22.7)                      | 19 (18.6)                    |                  |
| IMD (decile)          | 4.0 [2.0, 6.0]           | 4.0 [2.0, 6.0]                 | 4.0 [2.0, 7.0]               | 3.0 [1.0, 6.0]                 | 3.0 [1.8, 6.0]               | <b>0.015</b>     |
| IMD not reported      | 66 (8.0)                 | 23 (9.1)                       | 52 (37.1)                    | 5 (11.4)                       | 10 (9.8)                     | <b>&lt;0.001</b> |

|                                           |                   |                    |                   |                   |                   |                  |
|-------------------------------------------|-------------------|--------------------|-------------------|-------------------|-------------------|------------------|
| HBeAg status                              |                   |                    |                   |                   |                   |                  |
| Negative                                  | 323 (80.8)        | 98 (53.8)          | 90 (89.1)         | 3 (7.5)           | 27 (32.5)         | <b>&lt;0.001</b> |
| Positive                                  | 77 (19.2)         | 84 (46.2)          | 11 (10.9)         | 37 (92.5)         | 56 (67.5)         |                  |
| Not available                             | 427 (51.6)        | 72 (28.3)          | 39 (27.9)         | 4 (9.1)           | 19 (18.6)         |                  |
| Anti-HBe status                           |                   |                    |                   |                   |                   |                  |
| Negative                                  | 125 (26.2)        | 74 (41.1)          | 15 (14.6)         | 37 (92.5)         | 54 (65.9)         | <b>&lt;0.001</b> |
| Positive                                  | 353 (73.8)        | 106 (58.9)         | 88 (85.4)         | 3 (7.5)           | 28 (34.1)         |                  |
| Not available                             | 349 (42.2)        | 74 (29.1)          | 37 (26.4)         | 4 (9.1)           | 20 (19.6)         |                  |
| HBV VL, log <sub>10</sub> IU/ml           | 1.5 [1.3, 2.5]    | 6.3 [5.1, 7.7]     | 3.6 [2.8, 4.5]    | 8.2 [7.5, 8.5]    | 6.3 [4.4, 8.2]    | <b>&lt;0.001</b> |
| HBV VL category, IU/ml                    |                   |                    |                   |                   |                   | <b>&lt;0.001</b> |
| <20                                       | 118 (14.3)        | 0 (0.0)            | 1 (0.7)           | 0 (0.0)           | 1 (1.0)           |                  |
| 20 - <2000                                | 590 (71.3)        | 3 (1.2)            | 52 (37.1)         | 2 (4.5)           | 6 (5.9)           |                  |
| 2000 - <20,000                            | 77 (9.3)          | 15 (5.9)           | 50 (35.7)         | 0 (0.0)           | 13 (12.7)         |                  |
| >=20,000                                  | 42 (5.1)          | 236 (92.9)         | 37 (26.4)         | 42 (95.5)         | 82 (80.4)         |                  |
| ALT, IU/L                                 | 28 [19, 45]       | 70 [38, 147]       | 31 [21, 40]       | 35 [25, 50]       | 42 [33, 73]       | <b>&lt;0.001</b> |
| AST, IU/L                                 | 30 [24, 40]       | 48 [34, 79]        | 27 [23, 32]       | 27 [22, 51]       | 32 [28, 54]       | <b>&lt;0.001</b> |
| Platelets, 10 <sup>9</sup> /L             | 199 [158, 248]    | 193 [155, 231]     | 218 [169, 257]    | 203 [177, 247]    | 221 [178, 270]    | <b>0.001</b>     |
| Albumin, g/L                              | 40.0 [36.0, 43.0] | 40.0 [37.0, 42.0]  | 43.0 [39.2, 45.8] | 39.0 [35.8, 43.2] | 41.0 [38.0, 43.0] | <b>&lt;0.001</b> |
| ALP, IU/L                                 | 79.0 [62.0, 98.0] | 80.0 [61.0, 103.5] | 64.0 [52.0, 80.8] | 64.5 [60.0, 78.2] | 70.5 [61.0, 88.2] | <b>&lt;0.001</b> |
| Bilirubin, μmol/L                         | 9.0 [6.0, 13.0]   | 11.0 [7.5, 15.0]   | 8.5 [6.0, 12.0]   | 10.0 [6.0, 11.5]  | 10.0 [7.5, 13.0]  | <b>0.001</b>     |
| eGFR category, mL/min/1.73 m <sup>2</sup> |                   |                    |                   |                   |                   | <b>&lt;0.001</b> |
| >=90                                      | 251 (40.2)        | 75 (43.1)          | 53 (54.1)         | 9 (75.0)          | 37 (64.9)         |                  |
| >=60 & <=89                               | 265 (42.5)        | 88 (50.6)          | 38 (38.8)         | 3 (25.0)          | 16 (28.1)         |                  |



|                             |                |                |                |                |                |                  |
|-----------------------------|----------------|----------------|----------------|----------------|----------------|------------------|
| <=59                        | 108 (17.3)     | 11 (6.3)       | 7 (7.1)        | 0 (0.0)        | 4 (7.0)        |                  |
| Not available               | 203 (24.5)     | 80 (31.5)      | 42 (30.0)      | 32 (72.7)      | 45 (44.1)      |                  |
| Urea, mmol/L                | 5.0 [4.0, 6.5] | 4.8 [3.9, 5.8] | 4.8 [3.9, 5.9] | 3.6 [3.2, 4.4] | 5.1 [4.1, 6.0] | <b>&lt;0.001</b> |
| Urea, not available         | 39 (4.7)       | 16 (6.3)       | 27 (19.3)      | 12 (27.3)      | 25 (24.5)      |                  |
| Treatment regimens          |                |                |                |                |                | <b>&lt;0.001</b> |
| TDF                         | 468 (56.6)     | 189 (74.4)     | 94 (67.1)      | 33 (75.0)      | 63 (61.8)      |                  |
| ETV                         | 161 (19.5)     | 30 (11.8)      | 25 (17.9)      | 3 (6.8)        | 12 (11.8)      |                  |
| ETV+TDF                     | 39 (4.7)       | 19 (7.5)       | 9 (6.4)        | 3 (6.8)        | 12 (11.8)      |                  |
| LAM/ADE+TDF                 | 30 (3.6)       | 6 (2.4)        | 2 (1.4)        | 1 (2.3)        | 6 (5.9)        |                  |
| LAM/ADE+ETV                 | 14 (1.7)       | 0 (0.0)        | 2 (1.4)        | 0 (0.0)        | 1 (1.0)        |                  |
| Other regimens <sup>†</sup> | 115 (13.9)     | 10 (3.9)       | 8 (5.7)        | 4 (9.1)        | 8 (7.8)        |                  |

Data are the number (%) or median [IQR]. IMD, Index of Multiple Deprivation; VL, viral load; ALT, alanine aminotransferase; TDF, tenofovir disoproxil fumarate; ETV, entecavir; LAM, lamivudine; ADE, adefovir. Comparison was conducted across non-missing categories for a categorical variable. <sup>†</sup> Four patients were on interferon only, 113 patients were on single drug of LAM or ADE, 18 patients were on interferon combined with TDF and/or ETV, 10 patients on a combination of LAM, TDF, and ETV.

**Table S6.** Characteristics of patients at presentation stratified by the virologic trajectory patterns identified by latent class mixed modelling in the validation cohort (n=518).

| <b>Characteristics</b> | <b>Class 1<br/>N =279 (53.9%)</b> | <b>Class 2<br/>N=129 (24.9%)</b> | <b>Class 3<br/>N=45 (8.7%)</b> | <b>Class 4<br/>N=19 (3.7%)</b> | <b>Class 5<br/>N=46 (8.9%)</b> |
|------------------------|-----------------------------------|----------------------------------|--------------------------------|--------------------------------|--------------------------------|
|                        | Long term suppression             | Timely virological suppression   | Persistent moderate viraemia   | Persistent high-level viraemia | Slow virological suppression   |
| Sex, male              | 189 (67.7)                        | 87 (67.4)                        | 26 (57.8)                      | 11 (57.9)                      | 25 (54.3)                      |
| Age, years             | 43 [35, 55]                       | 39 [32, 48]                      | 39 [33, 46]                    | 31 [24, 38]                    | 36 [31, 48]                    |
| Age group, years       |                                   |                                  |                                |                                |                                |
| 18-24                  | 3 (1.1)                           | 9 (7.0)                          | 1 (2.2)                        | 5 (26.3)                       | 4 (8.7)                        |
| 25-34                  | 64 (22.9)                         | 37 (28.7)                        | 16 (35.6)                      | 7 (36.8)                       | 14 (30.4)                      |
| 35-44                  | 87 (31.2)                         | 39 (30.2)                        | 14 (31.1)                      | 4 (21.1)                       | 16 (34.8)                      |
| 45-54                  | 54 (19.4)                         | 25 (19.4)                        | 9 (20.0)                       | 1 (5.3)                        | 5 (10.9)                       |
| 55-64                  | 49 (17.6)                         | 15 (11.6)                        | 5 (11.1)                       | 2 (10.5)                       | 7 (15.2)                       |
| 65-74                  | 17 (6.1)                          | 1 (0.8)                          | 0 (0.0)                        | 0 (0.0)                        | 0 (0.0)                        |
| >=75                   | 5 (1.8)                           | 3 (2.3)                          | 0 (0.0)                        | 0 (0.0)                        | 0 (0.0)                        |
| Ethnic group           |                                   |                                  |                                |                                |                                |
| Asian                  | 107 (44.6)                        | 46 (44.2)                        | 22 (51.2)                      | 9 (56.2)                       | 22 (52.4)                      |
| Black                  | 44 (18.3)                         | 16 (15.4)                        | 6 (14.0)                       | 2 (12.5)                       | 3 (7.1)                        |
| White                  | 73 (30.4)                         | 33 (31.7)                        | 12 (27.9)                      | 3 (18.8)                       | 12 (28.6)                      |
| Mixed/other ethnicity  | 16 (6.7)                          | 9 (8.7)                          | 3 (7.0)                        | 2 (12.5)                       | 5 (11.9)                       |
| Not reported           | 39 (14.0)                         | 25 (19.4)                        | 2 (4.4)                        | 3 (15.8)                       | 4 (8.7)                        |

|                        |                |                |                |                |                |
|------------------------|----------------|----------------|----------------|----------------|----------------|
| IMD (decile)           | 6.0 [4.0, 9.0] | 7.0 [5.0, 9.0] | 7.0 [5.0, 9.0] | 6.0 [5.0, 8.0] | 6.0 [4.0, 9.0] |
| IMD category           |                |                |                |                |                |
| 20% most deprived      | 28 (10.6)      | 12 (9.8)       | 2 (4.7)        | 1 (5.6)        | 5 (11.4)       |
| 20% to 40%             | 49 (18.6)      | 18 (14.8)      | 7 (16.3)       | 3 (16.7)       | 8 (18.2)       |
| 40% to 60%             | 57 (21.7)      | 26 (21.3)      | 12 (27.9)      | 8 (44.4)       | 11 (25.0)      |
| 60% to 80%             | 61 (23.2)      | 31 (25.4)      | 9 (20.9)       | 2 (11.1)       | 7 (15.9)       |
| 20% least deprived     | 68 (25.9)      | 35 (28.7)      | 13 (30.2)      | 4 (22.2)       | 13 (29.5)      |
| Not reported           | 16 (5.7)       | 7 (5.4)        | 2 (4.4)        | 1 (5.3)        | 2 (4.3)        |
| HBeAg status           |                |                |                |                |                |
| Negative               | 169 (80.1)     | 60 (48.8)      | 26 (78.8)      | 0 (0.0)        | 18 (47.4)      |
| Positive               | 42 (19.9)      | 63 (51.2)      | 7 (21.2)       | 17 (100.0)     | 20 (52.6)      |
| Not available          | 68 (24.4)      | 6 (4.7)        | 12 (26.7)      | 2 (10.5)       | 8 (17.4)       |
| Anti-HBe status        |                |                |                |                |                |
| Negative               | 51 (25.0)      | 64 (52.0)      | 6 (18.2)       | 16 (94.1)      | 18 (50.0)      |
| Positive               | 153 (75.0)     | 59 (48.0)      | 27 (81.8)      | 1 (5.9)        | 18 (50.0)      |
| Not available          | 75 (26.9)      | 6 (4.7)        | 12 (26.7)      | 2 (10.5)       | 10 (21.7)      |
| HBV VL, log10 IU/ml    | 2.1 [1.4, 3.4] | 6.4 [5.0, 7.7] | 3.9 [3.2, 4.6] | 8.0 [7.5, 8.2] | 7.1 [5.1, 8.1] |
| HBV VL category, IU/ml |                |                |                |                |                |
| <20                    | 46 (16.5)      | 0 (0.0)        | 0 (0.0)        | 0 (0.0)        | 0 (0.0)        |
| 20 - <2000             | 173 (62.0)     | 1 (0.8)        | 13 (28.9)      | 0 (0.0)        | 2 (4.3)        |

|                                              |                      |                      |                      |                      |                      |
|----------------------------------------------|----------------------|----------------------|----------------------|----------------------|----------------------|
| 2000 - <20,000                               | 44 (15.8)            | 14 (10.9)            | 18 (40.0)            | 0 (0.0)              | 0 (0.0)              |
| >=20,000                                     | 16 (5.7)             | 114 (88.4)           | 14 (31.1)            | 19 (100.0)           | 44 (95.7)            |
| ALT, IU/L                                    | 33.0 [23.0, 51.0]    | 58.0 [34.0, 102.0]   | 34.5 [22.0, 44.5]    | 34.0 [17.5, 49.5]    | 39.5 [30.2, 62.8]    |
| AST, IU/L                                    | 35.5 [27.0, 46.8]    | 42.5 [34.5, 66.5]    | 26.5 [20.5, 36.5]    | 15.0 [15.0, 15.0]    | 35.0 [30.0, 56.0]    |
| Platelets, 10 <sup>9</sup> /L                | 185.0 [150.0, 232.0] | 206.0 [168.0, 239.0] | 217.0 [174.0, 230.0] | 203.0 [193.0, 239.0] | 199.5 [179.8, 232.0] |
| Albumin, g/L                                 | 40.0 [38.0, 43.0]    | 40.0 [35.0, 42.0]    | 41.0 [40.0, 44.0]    | 36.0 [31.0, 40.0]    | 39.0 [35.0, 41.2]    |
| ALP, IU/L                                    | 74.0 [61.0, 96.0]    | 84.0 [65.0, 108.0]   | 67.5 [59.5, 79.8]    | 87.0 [71.0, 107.0]   | 71.5 [59.5, 88.5]    |
| Bilirubin, µmol/L                            | 11.0 [8.0, 14.0]     | 11.0 [8.0, 15.0]     | 10.0 [6.8, 16.5]     | 7.0 [5.0, 9.0]       | 9.5 [6.8, 12.2]      |
| eGFR category,<br>mL/min/1.73 m <sup>2</sup> |                      |                      |                      |                      |                      |
| >=90                                         | 146 (59.3)           | 72 (64.9)            | 13 (41.9)            | 8 (80.0)             | 15 (44.1)            |
| >=60 & <=89                                  | 85 (34.6)            | 37 (33.3)            | 16 (51.6)            | 2 (20.0)             | 19 (55.9)            |
| <=59                                         | 15 (6.1)             | 2 (1.8)              | 2 (6.5)              | 0 (0.0)              | 0 (0.0)              |
| Not available                                | 33 (11.8)            | 18 (14.0)            | 14 (31.1)            | 9 (47.4)             | 12 (26.1)            |
| Urea, mmol/L                                 | 5.0 [4.2, 6.1]       | 4.9 [4.0, 5.8]       | 4.6 [3.9, 5.0]       | 4.2 [3.9, 4.8]       | 4.9 [4.2, 5.8]       |
| Treatment regimens                           |                      |                      |                      |                      |                      |
| TDF                                          | 94 (33.7)            | 64 (49.6)            | 21 (46.7)            | 7 (36.8)             | 15 (32.6)            |
| ETV                                          | 73 (26.2)            | 38 (29.5)            | 15 (33.3)            | 5 (26.3)             | 17 (37.0)            |
| ETV+TDF                                      | 25 (9.0)             | 19 (14.7)            | 8 (17.8)             | 6 (31.6)             | 10 (21.7)            |
| LAM/ADE+TDF                                  | 28 (10.0)            | 2 (1.6)              | 1 (2.2)              | 0 (0.0)              | 0 (0.0)              |
| LAM/ADE+ETV                                  | 33 (11.8)            | 1 (0.8)              | 0 (0.0)              | 0 (0.0)              | 0 (0.0)              |
| Other regimens                               | 26 (9.3)             | 5 (3.9)              | 0 (0.0)              | 1 (5.3)              | 4 (8.7)              |

*Data are the number (%) or median [IQR]. IMD, Index of Multiple Deprivation; VL, viral load; ALT, alanine aminotransferase; TDF, tenofovir disoproxil fumarate; ETV, entecavir; LAM, lamivudine; ADE, adefovir. Significance tests were not conducted in the validation cohort due to small numbers in some classes.*

**Table S7.** Data source for determining liver fibrosis or cirrhosis

| Data source                 | Number of patients with evidence of liver fibrosis or cirrhosis by each source |
|-----------------------------|--------------------------------------------------------------------------------|
| Biopsy                      | 43 (13%)                                                                       |
| Elastography (FibroScan)    | 34 (10%)                                                                       |
| Imaging (Ultrasound/CT/MRI) | 22 (7%)                                                                        |
| ICD                         | 78 (23%)                                                                       |
| FIB4 or APRI                | 155 (47%)                                                                      |
| Total                       | 332                                                                            |

*CT – computer tomography / MRI – magnetic resonance imaging*

*ICD – international classification of disease*

*FIB4 and APRI – laboratory based liver fibrosis scores*

**Table S8.** Comparisons of probability of being liver fibrosis and cirrhosis-free status over time for classes with distinct VL trajectory patterns

|         | Class 1      | Class 2      | Class 3           | Class 4      |
|---------|--------------|--------------|-------------------|--------------|
| Class 2 | 0.727        | -            | -                 | -            |
| Class 3 | <b>0.003</b> | <b>0.009</b> | -                 |              |
| Class 4 | 0.340        | 0.397        | 0.466             | -            |
| Class 5 | <b>0.003</b> | <b>0.034</b> | <b>&lt;0.0001</b> | <b>0.029</b> |

*Data were p values. The pairwise comparisons were based on log-rank test.*



**Table S9.** Univariate and multivariate Cox proportional-hazards models investigating associations of different VL trajectory patterns with liver disease progression to fibrosis and/or cirrhosis among adults with chronic HBV infection on NA therapy

| Variables                      | Univariate analysis |                  | Multivariate analysis |                  |
|--------------------------------|---------------------|------------------|-----------------------|------------------|
|                                | Crude HR (95% CIs)  | p value          | Adjusted HR (95% CI)  | p value          |
| VL trajectory                  |                     |                  |                       |                  |
| Class 1 (reference)            | 1.0                 |                  | 1.0                   |                  |
| Class 2                        | 1.05 (0.79 - 1.40)  | 0.734            | 1.08 (0.77 - 1.51)    | 0.654            |
| Class 3                        | 0.53 (0.35 - 0.81)  | <b>0.004</b>     | 0.78 (0.50 - 1.23)    | 0.286            |
| Class 4                        | 0.75 (0.42 - 1.35)  | 0.338            | 1.55 (0.79 - 3.01)    | 0.199            |
| Class 5                        | 1.63 (1.18 - 2.25)  | <b>0.003</b>     | 2.24 (1.55 - 3.24)    | <b>&lt;0.001</b> |
| Age group                      |                     |                  |                       |                  |
| 18-24 years                    | 1.54 (0.87 - 2.72)  | 0.137            | 1.64 (0.9 - 3.01)     | 0.109            |
| 25-34 years (reference)        | 1.0                 |                  | 1.0                   |                  |
| 35-44 years                    | 1.12 (0.8 - 1.58)   | 0.515            | 1.13 (0.79 - 1.6)     | 0.499            |
| 45-54 years                    | 1.52 (1.08 - 2.14)  | <b>0.016</b>     | 1.31 (0.91 - 1.9)     | 0.150            |
| 55-64 years                    | 2.34 (1.65 - 3.33)  | <b>&lt;0.001</b> | 1.95 (1.33 - 2.85)    | <b>&lt;0.001</b> |
| 65-74 years                    | 3.36 (2.16 - 5.23)  | <b>&lt;0.001</b> | 3.13 (1.93 - 5.07)    | <b>&lt;0.001</b> |
| >=75 years                     | 5.24 (2.74 - 10.02) | <b>&lt;0.001</b> | 5.70 (2.84 - 11.44)   | <b>&lt;0.001</b> |
| Sex                            |                     |                  |                       |                  |
| Female (reference)             | 1.0                 |                  | 1.0                   |                  |
| Male                           | 1.59 (1.25 - 2.02)  | <b>&lt;0.001</b> | 1.40 (1.06 - 1.84)    | <b>0.016</b>     |
| Ethnic group                   |                     |                  |                       |                  |
| White (reference)              | 1.0                 |                  | 1.0                   |                  |
| Asian                          | 0.81 (0.61 - 1.09)  | 0.163            | 0.91 (0.68 - 1.22)    | 0.522            |
| Black                          | 1.17 (0.85 - 1.62)  | 0.338            | 1.29 (0.92 - 1.82)    | 0.141            |
| Mixed or other ethnicity       | 1.02 (0.72 - 1.46)  | 0.896            | 1.07 (0.74 - 1.55)    | 0.732            |
| IMD                            |                     |                  |                       |                  |
| 20% most deprived              | 1.01 (0.72 - 1.41)  | 0.966            | 0.94 (0.67 - 1.31)    | 0.719            |
| 20% to 40%                     | 1.14 (0.81 - 1.59)  | 0.445            | 1.21 (0.86 - 1.70)    | 0.275            |
| 40% to 60% (reference)         | 1.0                 |                  | 1.0                   |                  |
| 60% to 80%                     | 1.21 (0.83 - 1.77)  | 0.320            | 1.23 (0.86 - 1.78)    | 0.262            |
| 20% least deprived             | 1.23 (0.83 - 1.81)  | 0.305            | 1.27 (0.86 - 1.90)    | 0.231            |
| Coinfection <sup>†</sup> (Yes) | 1.6 (1.01 - 2.51)   | <b>0.043</b>     | 1.09 (0.65 - 1.84)    | 0.748            |
| HBeAg status (Positive)        | 1.01 (0.77 - 1.32)  | 0.939            | 1.01 (0.60 - 1.68)    | 0.982            |
| Anti-HBe status (Positive)     | 1.01 (0.79 - 1.29)  | 0.928            | 1.52 (0.94 - 2.46)    | 0.091            |
| Albumin, g/L                   | 0.94 (0.93, 0.96)   | <b>&lt;0.001</b> | 0.95 (0.93 - 0.97)    | <b>&lt;0.001</b> |

|                                                          |                    |                  |                    |                  |
|----------------------------------------------------------|--------------------|------------------|--------------------|------------------|
| ALP (divided by 10), IU/L                                | 1.03 (1.02, 1.04)  | <b>&lt;0.001</b> | 1.03 (1.01 - 1.04) | <b>&lt;0.001</b> |
| AST (divided by 10), IU/L                                | 1.07 (1.05, 1.10)  | <b>&lt;0.001</b> | 1.07 (1.04 - 1.10) | <b>&lt;0.001</b> |
| ALT (divided by 10), IU/L                                | 1.01 (0.99, 1.01)  | 0.199            | 0.99 (0.98 - 1.01) | 0.239            |
| Bilirubin (divided by 10), $\mu\text{mol/L}$             | 1.03 (0.99, 1.07)  | 0.074            | 1.02 (0.97 - 1.08) | 0.422            |
| Platelets (divided by 10), $10^9/\text{L}$               | 0.94 (0.92, 0.96)  | <b>&lt;0.001</b> | 0.94 (0.92 - 0.96) | <b>&lt;0.001</b> |
| Haemoglobin (divided by 10), g/L                         | 1.01 (0.99, 1.03)  | 0.113            | 1.01 (0.99 - 1.03) | 0.308            |
| HBV VL <sup>‡</sup> , log <sub>10</sub> IU/ml            | 0.98 (0.93, 1.03)  | 0.40             |                    |                  |
| eGFR category                                            |                    |                  |                    |                  |
| $\geq 90$ mL/minute/1.73 m <sup>2</sup><br>(reference)   | 1.0                |                  | 1.0                |                  |
| $\geq 60$ and $\leq 89$<br>mL/minute/1.73 m <sup>2</sup> | 1.09 (0.85 - 1.39) | 0.500            | 0.88 (0.68 - 1.13) | 0.303            |
| $\leq 59$ mL/minute/1.73 m <sup>2</sup>                  | 1.87 (1.36 - 2.58) | <b>&lt;0.001</b> | 0.95 (0.60 - 1.51) | 0.834            |
| Urea, mmol/L                                             | 1.06 (1.03 - 1.08) | <b>&lt;0.001</b> | 1.00 (0.96 - 1.04) | 0.938            |
| Treatment regimens                                       |                    |                  |                    |                  |
| TDF (reference)                                          | 1.0                |                  | 1.0                |                  |
| ETV                                                      | 1.19 (0.89 - 1.58) | 0.239            | 0.92 (0.68 - 1.25) | 0.601            |
| ETV+TDF                                                  | 1.86 (1.32 - 2.62) | <b>&lt;0.001</b> | 1.66 (1.16 - 2.37) | <b>0.006</b>     |
| LAM/ADE+TDF                                              | 1.62 (0.97 - 2.71) | 0.066            | 1.14 (0.65 - 1.98) | 0.655            |
| LAM/ADE+ETV                                              | 2.21 (1.20 - 4.09) | <b>0.011</b>     | 1.32 (0.69 - 2.55) | 0.404            |
| Other regimens                                           | 1.56 (1.06 - 2.28) | <b>0.022</b>     | 1.06 (0.69 - 1.62) | 0.791            |

<sup>†</sup> Coinfection with HIV, HCV, or HDV.

<sup>‡</sup> The variable of HBV VL levels at baseline was not separately accounted for the multivariate analysis because the VL trajectory already incorporates the HBV VL levels at baseline. 1412 patients with data available for identifying liver fibrosis and cirrhosis were included for multivariate analysis. Class 1 (VL long term suppressed), Class 2 (persistent viraemia with moderate VL), Class 3 (VL suppressed as expected), Class 4 (VL non-suppressing with high VL), Class 5 (VL slowly suppressed). VL, viral load; ALT, Alanine transaminase; ALP, Alkaline phosphatase; HR, Hazards ratio, TDF, tenofovir disoproxil fumarate; ETV, entecavir; LAM, lamivudine; ADE, adefovir.

**Table S10.** Sensitivity analysis only adjusting for age and sex for investigating associations of different VL trajectory patterns with liver disease progression to fibrosis and/or cirrhosis among adults with chronic HBV infection on NA therapy

| <b>Variables</b>        | <b>Adjusted HR (95% CI)</b> | <b>p value</b>   |
|-------------------------|-----------------------------|------------------|
| VL trajectory           |                             |                  |
| Class 1 (reference)     | 1.0                         |                  |
| Class 2                 | 1.15 (0.86 – 1.53)          | 0.354            |
| Class 3                 | 0.72 (0.47 – 1.11)          | 0.138            |
| Class 4                 | 1.15 (0.62 – 2.13)          | 0.665            |
| Class 5                 | 1.93 (1.38 – 2.69)          | <b>&lt;0.001</b> |
| Age group               |                             |                  |
| 18-24 years             | 1.40 (0.78 – 2.51)          | 0.264            |
| 25-34 years (reference) | 1.0                         |                  |
| 35-44 years             | 1.10 (0.78 – 1.55)          | 0.583            |
| 45-54 years             | 1.50 (1.06 – 2.13)          | <b>0.021</b>     |
| 55-64 years             | 2.20 (1.54 – 3.15)          | <b>&lt;0.001</b> |
| 65-74 years             | 3.28 (2.09 – 5.15)          | <b>&lt;0.001</b> |
| >=75 years              | 5.70 (2.95 – 11.01)         | <b>&lt;0.001</b> |
| Sex                     |                             |                  |
| Female (reference)      | 1.0                         |                  |
| Male                    | 1.52 (1.19 – 1.94)          | <b>&lt;0.001</b> |

**Table S11.** Predictive ability (AUC, Sensitivity, Specificity) of each single variable (VL trajectory, demographics, and biochemistry parameters) for liver fibrosis and cirrhosis

| <b>Variables</b>   | <b>AUC</b>          | <b>Sensitivity</b> | <b>Specificity</b> | <b>Accuracy</b> | <b>p-value<br/>(compared to<br/>VL trajectory)</b> |
|--------------------|---------------------|--------------------|--------------------|-----------------|----------------------------------------------------|
| VL trajectory      | 0.658 (0.624-0.691) | 0.593              | 0.650              | 0.637           | -                                                  |
| Baseline age       | 0.666 (0.632-0.699) | 0.581              | 0.655              | 0.637           | 0.62                                               |
| Sex                | 0.635 (0.601-0.670) | 0.554              | 0.604              | 0.592           | 0.10                                               |
| Platelets          | 0.678 (0.643-0.711) | 0.614              | 0.645              | 0.638           | 0.26                                               |
| AST                | 0.642 (0.608-0.676) | 0.542              | 0.678              | 0.646           | 0.20                                               |
| Albumin            | 0.655 (0.622-0.689) | 0.569              | 0.649              | 0.630           | 0.87                                               |
| ALP                | 0.655 (0.621-0.689) | 0.566              | 0.676              | 0.650           | 0.83                                               |
| Treatment regimens | 0.653 (0.619-0.687) | 0.578              | 0.670              | 0.649           | 0.75                                               |

*Note: ALP, Alkaline phosphatase; ALT, Alanine transaminase; VL, viral load; ROC, receiver operating characteristic; AUC, the area under an ROC curve.*

**Table S12.** Improvement of predictive ability of the addition of VL trajectories, other biochemistry parameters, and treatment regimens for liver fibrosis and cirrhosis

| <b>Predictors</b>                                                               | <b>AUC</b>           | <b>Sensitivity</b> | <b>Specificity</b> | <b>Accuracy</b> | <b>p-value<br/>(compared to<br/>preceding row)</b> |
|---------------------------------------------------------------------------------|----------------------|--------------------|--------------------|-----------------|----------------------------------------------------|
| Baseline age + sex                                                              | 0.669 (0.635, 0.703) | 0.590              | 0.636              | 0.625           | -                                                  |
| Baseline age + sex + PLT + AST + ALB + ALP                                      | 0.731 (0.699, 0.763) | 0.639              | 0.688              | 0.676           | <b>&lt;0.001</b>                                   |
| Baseline age + sex + PLT + AST + ALB + ALP + Treatment regimens                 | 0.738 (0.706, 0.770) | 0.645              | 0.700              | 0.687           | 0.14                                               |
| Baseline age + sex + PLT + AST + ALB + ALP + Treatment regimens + VL trajectory | 0.756 (0.725, 0.787) | 0.684              | 0.714              | 0.707           | <b>&lt;0.01</b>                                    |

*All the models adjusted for other parameters that were included in the multivariate analysis, including ethnic group, IMD, HBeAg, anti-HBe, coinfection, ALT, Bilirubin, Hb, eGFR, and Urea.*

**Table S13.** Sensitivity analysis excluding NA agents other than tenofovir and entecavir for investigating associations of different VL trajectory patterns with liver disease progression to fibrosis and/or cirrhosis among adults with chronic hepatitis B on NA therapy

| <b>Variables</b>           | <b>Adjusted HR (95% CI)</b> | <b>p value</b>   |
|----------------------------|-----------------------------|------------------|
| VL trajectory              |                             |                  |
| Class 1 (reference)        | 1.0                         |                  |
| Class 2                    | 1.21 (0.86 - 1.71)          | 0.267            |
| Class 3                    | 0.85 (0.53 - 1.37)          | 0.507            |
| Class 4                    | 1.57 (0.79 - 3.14)          | 0.199            |
| Class 5                    | 2.54 (1.73 - 3.71)          | <b>&lt;0.001</b> |
| Age group                  |                             |                  |
| 18-24 years                | 1.51 (0.81 - 2.81)          | 0.196            |
| 25-34 years (reference)    | 1.0                         |                  |
| 35-44 years                | 1.03 (0.71 - 1.49)          | 0.897            |
| 45-54 years                | 1.23 (0.82 - 1.83)          | 0.318            |
| 55-64 years                | 1.54 (1.01 - 2.34)          | <b>0.043</b>     |
| 65-74 years                | 2.68 (1.58 - 4.55)          | <b>&lt;0.001</b> |
| >=75 years                 | 4.43 (2.04 - 9.61)          | <b>&lt;0.001</b> |
| Sex                        |                             |                  |
| Female (reference)         | 1.0                         |                  |
| Male                       | 1.31 (0.98 - 1.76)          | 0.072            |
| Ethnic group               |                             |                  |
| White (reference)          | 1.0                         |                  |
| Asian                      | 0.92 (0.67 - 1.27)          | 0.610            |
| Black                      | 1.13 (0.76 - 1.68)          | 0.532            |
| Mixed or other ethnicity   | 1.10 (0.74 - 1.64)          | 0.627            |
| IMD                        |                             |                  |
| 20% most deprived          | 0.86 (0.59 - 1.27)          | 0.452            |
| 20% to 40%                 | 1.28 (0.87 - 1.86)          | 0.206            |
| 40% to 60% (reference)     | 1.0                         |                  |
| 60% to 80%                 | 1.15 (0.76 - 1.75)          | 0.500            |
| 20% least deprived         | 1.45 (0.95 - 2.23)          | 0.088            |
| Coinfection (Yes)          | 1.14 (0.70 - 1.83)          | 0.598            |
| HBeAg status (Positive)    | 0.81 (0.46 - 1.44)          | 0.475            |
| Anti-HBe status (Positive) | 1.27 (0.73 - 2.22)          | 0.396            |
| Albumin, g/L               | 0.96 (0.94 - 0.99)          | <b>0.021</b>     |
| ALP (divided by 10), IU/L  | 1.05 (1.03 - 1.06)          | <b>&lt;0.001</b> |

|                                                  |                    |                  |
|--------------------------------------------------|--------------------|------------------|
| AST (divided by 10), IU/L                        | 1.13 (1.09 - 1.18) | <b>&lt;0.001</b> |
| ALT (divided by 10), IU/L                        | 0.99 (0.99 - 1.00) | 0.114            |
| Bilirubin (divided by 10),<br>μmol/L             | 1.00 (0.99 - 1.06) | 0.961            |
| Platelets (divided by 10),<br>10 <sup>9</sup> /L | 0.94 (0.92 - 0.96) | <b>&lt;0.001</b> |
| Haemoglobin (divided by<br>10), g/L              | 1.01 (0.99 - 1.03) | 0.368            |
| eGFR category                                    |                    |                  |
| ≥90 mL/minute/1.73 m <sup>2</sup><br>(reference) | 1.0                |                  |
| ≥60 and ≤89<br>mL/minute/1.73 m <sup>2</sup>     | 1.03 (0.78 - 1.35) | 0.861            |
| ≤59 mL/minute/1.73 m <sup>2</sup>                | 1.44 (0.84 - 2.46) | 0.180            |
| Urea, mmol/L                                     | 0.99 (0.94 - 1.04) | 0.601            |
| Treatment regimens                               |                    |                  |
| TDF (reference)                                  | 1.0                |                  |
| ETV                                              | 0.92 (0.68 - 1.24) | 0.570            |
| ETV+TDF                                          | 1.49 (1.03 - 2.14) | <b>0.034</b>     |



**Table S14.** Longitudinal trend of quantitative HBsAg level over time for distinct virologic trajectory patterns for patients with chronic HBV infection on NA therapy in the subset (N=273) of the study cohort

|                                              | Intercept (95% CI),<br>log <sub>10</sub> IU/ml | Coefficient $\beta$ (95% CI)      |
|----------------------------------------------|------------------------------------------------|-----------------------------------|
| Class 1 (VL long term suppressed)            | 3.86 (3.39, 4.33) ***                          | -0.0084 (-0.0116, -0.0052)<br>*** |
| Class 2 (VL suppressed timely)               | 4.45 (3.95, 4.95) ***                          | -0.0163 (-0.0217, -0.0108)<br>*** |
| Class 3 (VL persistent with moderate levels) | 4.06 (3.57, 4.56) ***                          | -0.0039 (-0.0085, 0.0006)         |
| Class 4 (VL persistent with high levels)     | 5.78 (4.79, 6.77) ***                          | -0.0103 (-0.0249, 0.0043)         |
| Class 5 (VL suppressed slowly)               | 4.99 (4.45, 5.53) ***                          | -0.0102 (-0.0174, -0.0032)<br>**  |

*Derivation and validation cohorts were combined according to the VL trajectories. 273 patients (out of 1885, 14.5%) had longitudinal data (at least two repeated measurements) of quantitative HBsAg level for modelling. Specifically, longitudinal data were available for 137, 49, 55, 7, and 25 patients in classes 1 to 5, respectively. In total, 1072 records of HBsAg levels are collected from these 273 patients. The longitudinal trends of HBsAg level over time were assessed by linear mixed effects models with random intercepts and slopes. All linear mixed effects models were adjusted for demographics (including age, sex, and ethnicity). \*\*\* indicates p value <0.001, \*\* indicates p value <0.01. HBV, Hepatitis B Virus; VL, viral load; NA, nucleos/tide analogue; HBsAg, Hepatitis B surface antigen.*

**Table S15.** The first and most recent measurements of quantitative HBsAg level during follow up for patients with chronic HBV infection on NA therapy in the subset (N=273) of the study cohort

| VL trajectory class | Number of patients with qHBsAg level available | Median [IQR] of qHBsAg level for the first measurements | First measurement of qHBsAg level (baseline or during follow up) |               | Median [IQR] of qHBsAg level for the most recent measurements | The most recent measurement of qHBsAg level |               |
|---------------------|------------------------------------------------|---------------------------------------------------------|------------------------------------------------------------------|---------------|---------------------------------------------------------------|---------------------------------------------|---------------|
|                     |                                                |                                                         | <100 IU/ml                                                       | ≥100 IU/ml    |                                                               | <100 IU/ml                                  | ≥100 IU/ml    |
| Class 1             | N=137                                          | 3.09 [2.49, 3.60]<br>log <sub>10</sub> IU/ml            | <b>17</b><br><b>(12.4)</b>                                       | 120<br>(87.6) | 2.90 [2.32, 3.45]<br>log <sub>10</sub> IU/ml                  | <b>26</b><br><b>(19.0)</b>                  | 111<br>(81.0) |
| Class 2             | N=49                                           | 3.58 [2.92, 4.16]<br>log <sub>10</sub> IU/ml            | <b>4</b><br><b>(8.2)</b>                                         | 45<br>(91.8)  | 3.28 [2.72, 3.77]<br>log <sub>10</sub> IU/ml                  | <b>7</b><br><b>(14.3)</b>                   | 42<br>(85.7)  |
| Class 3             | N=55                                           | 3.35 [2.86, 3.89]<br>log <sub>10</sub> IU/ml            | <b>1</b><br><b>(1.8)</b>                                         | 54<br>(98.2)  | 3.32 [2.77, 3.84]<br>log <sub>10</sub> IU/ml                  | <b>4</b><br><b>(7.3)</b>                    | 51<br>(92.7)  |
| Class 4             | N=7                                            | 4.71 [4.47, 4.92]<br>log <sub>10</sub> IU/ml            | <b>0 (0)</b>                                                     | 7 (100)       | 4.58 [4.16, 4.86]<br>log <sub>10</sub> IU/ml                  | <b>0 (0)</b>                                | 7<br>(100)    |
| Class 5             | N=25                                           | 4.20 [3.55, 4.58]<br>log <sub>10</sub> IU/ml            | <b>0 (0)</b>                                                     | 25 (100)      | 3.72 [2.96, 4.21]<br>log <sub>10</sub> IU/ml                  | <b>0 (0)</b>                                | 25<br>(100)   |

**Table S16.** Classification performance in validation cohort using a smaller number of VL measurements with restrictions on minimum follow up duration ( $\geq 6$  months)

|                                                                     | Use all VL measurements available                  | Use the first two VL measurements                  | Use the first three VL measurements                | Use the first four VL measurements                | Use the first five VL measurements                 |
|---------------------------------------------------------------------|----------------------------------------------------|----------------------------------------------------|----------------------------------------------------|---------------------------------------------------|----------------------------------------------------|
| Number of patients                                                  | 518                                                | 260                                                | 378                                                | 394                                               | 359                                                |
| Follow up duration (months) of VL measurements, median [IQR]        | 49 [25, 77]                                        | 12 [7, 19]                                         | 14 [9, 24]                                         | 19 [12, 31]                                       | 25 [17, 37]                                        |
| Discrimination                                                      | 0.9287                                             | 0.8323                                             | 0.8268                                             | 0.8487                                            | 0.8667                                             |
| Entropy                                                             | 0.8815                                             | 0.7307                                             | 0.7350                                             | 0.7678                                            | 0.7922                                             |
| APPA for each class (class 1: class 2: class 3: class 4: class 5)   | 0.9370:<br>0.8643:<br>0.9224:<br>0.9751:<br>0.9403 | 0.8809:<br>0.6221:<br>0.8342:<br>0.8162:<br>0.7402 | 0.8845:<br>0.6523:<br>0.8365:<br>0.7958:<br>0.7594 | 0.8916<br>0.7016<br>0.8709<br>0.8729<br>0.7848    | 0.8865:<br>0.7657:<br>0.8936:<br>0.8841:<br>0.8283 |
| Proportions per class (class 1: class 2: class 3: class 4: class 5) | 53.86%:<br>8.69%:<br>24.9%:<br>3.67%:<br>8.88%     | 61.54%:<br>8.85%:<br>10.77%:<br>7.69%:<br>11.15%   | 51.59%:<br>12.7%:<br>17.46%:<br>8.2%:<br>10.05%    | 45.43%:<br>13.45%:<br>22.84%:<br>7.87%:<br>10.41% | 43.18%:<br>13.37%:<br>24.51%:<br>10.03%:<br>8.91%  |

APPA, average of maximum posterior probability of assignments.

**Table S17.** Classification performance in validation cohort using a smaller number of VL measurements without restriction on minimum follow up duration

|                                                              | Use all VL measurements available                  | Use the first two VL measurements                | Use the first three VL measurements          | Use the first four VL measurements                 | Use the first six VL measurements               |
|--------------------------------------------------------------|----------------------------------------------------|--------------------------------------------------|----------------------------------------------|----------------------------------------------------|-------------------------------------------------|
| Number of patients                                           | 518                                                | 518                                              | 469                                          | 421                                                | 369                                             |
| Follow up duration (months) of VL measurements, median [IQR] | 49 [25, 77]                                        | 6 [3, 12]                                        | 12 [6, 21]                                   | 19 [11, 30]                                        | 24 [16, 37]                                     |
| Discrimination                                               | 0.9287                                             | 0.7835                                           | 0.8160                                       | 0.8481                                             | 0.8666                                          |
| Entropy                                                      | 0.8815                                             | 0.6660                                           | 0.7160                                       | 0.7642                                             | 0.7909                                          |
| APPA for each class                                          | 0.9370:<br>0.8643:<br>0.9224:<br>0.9751:<br>0.9403 | 0.861:<br>0.572:<br>0.719:<br>0.745:<br>0.661    | 0.8765: 0.6382:<br>0.8111: 0.7850:<br>0.7446 | 0.8897:<br>0.7022:<br>0.8689:<br>0.8734:<br>0.7786 | 0.8850:<br>0.7657<br>0.8933<br>0.8841<br>0.8283 |
| Proportions per class                                        | 53.86%:<br>8.69%:<br>24.9%:<br>3.67%:<br>8.88%     | 55.98%:<br>7.34%:<br>19.11%:<br>7.34%:<br>10.23% | 49.89%: 11.3%:<br>21.75%: 7.68%:<br>9.38%    | 45.61%<br>12.83%<br>23.75%<br>7.6%<br>10.21%       | 43.09%<br>13.01%<br>25.47%<br>9.76%<br>8.67%    |

APPA, average of maximum posterior probability of assignments.

**Table S18.** Relationship between VL classes and EASL definition of virological breakthrough

|                         | Virological breakthrough <sup>†</sup> |
|-------------------------|---------------------------------------|
| Overall cohort (n=1885) | 120/1885 (6.4%)                       |
| Class 1 (n=1106)        | 44/1106 (4.0%)                        |
| Class 2 (n=383)         | 11/383 (2.9%)                         |
| Class 3 (n=185)         | 32/185 (17.3%)                        |
| Class 4 (n=63)          | 19/63 (30.2%)                         |
| Class 5 (n=148)         | 14/148 (9.5%)                         |

<sup>†</sup> *Virological breakthrough: a confirmed increase in HBV DNA level of more than 1 log<sub>10</sub> IU/ml compared to the nadir HBV DNA level on-therapy.*
