# Supplementary material for: Distinct virologic trajectories in chronic hepatitis B identify heterogeneity in response to nucleos(t)ide analogue therapy
Source: PubMed Central journal article supplement (PMC11664071; doi:10.1016/j.jhepr.2024.101229), 2024-10-09
Supplement: mmc2.pdf [file mmc2.pdf]

## Journal of Hepatology

### CTAT methods

Tables for a “Complete, Transparent, Accurate and Timely account” (CTAT) are now mandatory for all revised submissions. The aim is to enhance the reproducibility of methods.

- Only include the parts relevant to your study
- Refer to the CTAT in the main text as ‘Supplementary CTAT Table’
- Do not add subheadings
- Add as many rows as needed to include all information
- Only include one item per row

If the CTAT form is not relevant to your study, please outline the reasons why:

|  |
|--|
|  |
|--|

#### 1.1 Antibodies

| Name | Citation | Supplier | Cat no. | Clone no. |
|------|----------|----------|---------|-----------|
| N/A  |          |          |         |           |

#### 1.2 Cell lines

| Name | Citation | Supplier | Cat no. | Passage no. | Authentication test method |
|------|----------|----------|---------|-------------|----------------------------|
| N/A  |          |          |         |             |                            |

#### 1.3 Organisms

| Name | Citation | Supplier | Strain | Sex | Age | Overall n number |
|------|----------|----------|--------|-----|-----|------------------|
| N/A  |          |          |        |     |     |                  |

#### 1.4 Sequence based reagents

| Name | Sequence | Supplier |
|------|----------|----------|
|      |          |          |

#### 1.5 Biological samples

| Description | Source | Identifier |
|-------------|--------|------------|
| N/A         |        |            |

#### 1.6 Deposited data

| Name of repository | Identifier | Link |
|--------------------|------------|------|
| N/A                |            |      |

## 1.7 Software

| Software name       | Manufacturer                           | Version       |
|---------------------|----------------------------------------|---------------|
| R Studio for Window | RStudio, PBC                           | 2022.07.2.576 |
| R                   | R Foundation for Statistical Computing | Version 4.2.2 |

## 1.8 Other (e.g. drugs, proteins, vectors etc.)

|    |  |  |
|----|--|--|
| NA |  |  |
|    |  |  |

## 1.9 Please provide the details of the corresponding methods author for the manuscript:

|                                           |
|-------------------------------------------|
| Tingyan Wang<br>tingyan.wang@ndm.ox.ac.uk |
|-------------------------------------------|

## 2.0 Please confirm for randomised controlled trials all versions of the clinical protocol are included in the submission. These will be published online as supplementary information.

|     |
|-----|
| N/A |
|-----|
